# Supplementary material for: Native Bovine Hydroxyapatite Powder, Demineralised Bone Matrix Powder, and Purified Bone Collagen Membranes Are Efficient in Repair of Critical-Sized Rat Calvarial Defects
Source: MDPI journal article supplement (doi:10.3390/ma13153393), 2020-07-31
Supplement: s1 [file s1]

# Native Bovine Hydroxyapatite Powder, Demineralised Bone Matrix Powder, and Purified Bone Collagen Membranes are Efficient in Repair of Critical-Sized Rat Calvarial Defects

Alexey Veremeev, Roman Bolgarin, Vladimir Nesterenko, Alexander Andreev-Andrievskiy and Anton Kutikhin

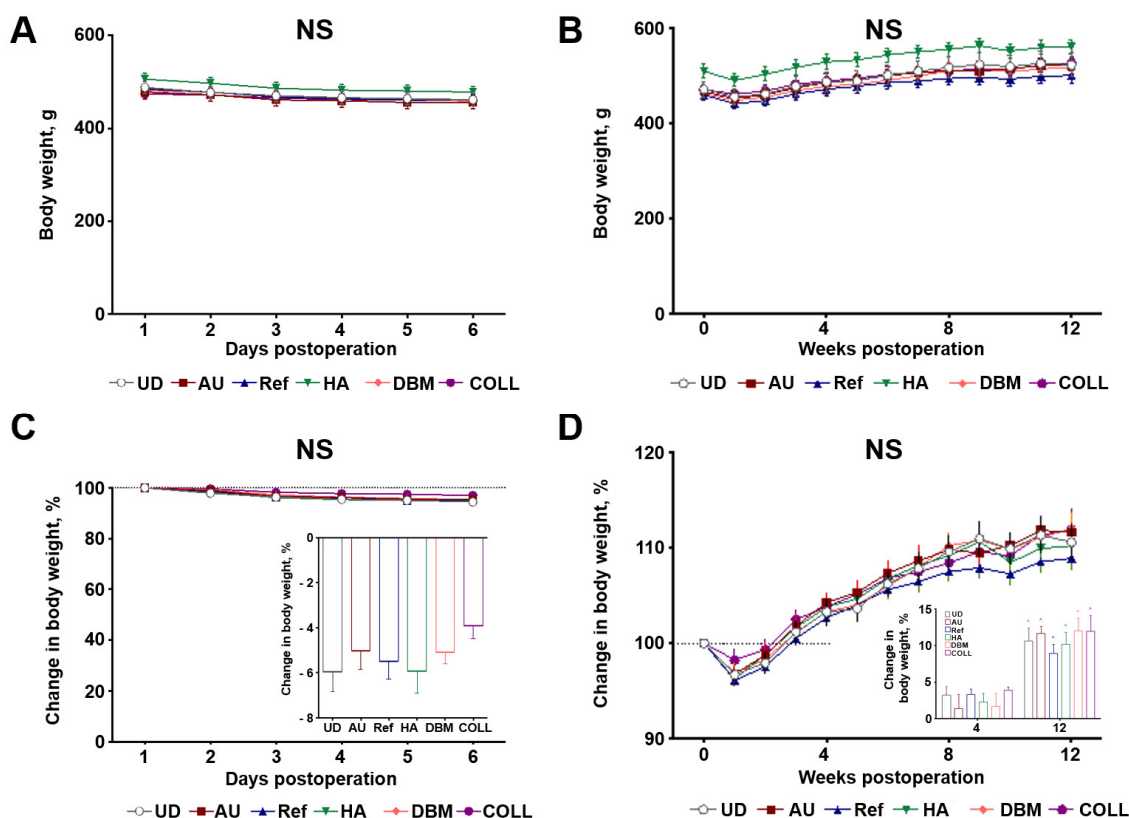

**Figure S1.** General safety examination of the implants. (A) Daily serial measurements of body weight during the first week postimplantation; (B) weekly serial measurements of body weight during 12 weeks postimplantation; and (C) daily serial calculation of body weight increment/decrement during the first week postimplantation. Inserts show relative change in body weight across the groups at 6 days postoperation; (D) weekly serial calculation of body weight increment/decrement during 12 weeks postimplantation. Inserts show relative change in body weight across the groups at 4 and 12 weeks postoperation. Unfilled defect, autograft, and Geistlich Bio-Oss® represent a negative control, positive control, and reference product, respectively.  $N = 12$  animals per group, two-way analysis of variance with Tukey's multiple comparisons test, no statistically significant differences. NS—non-significant intergroup differences, UD—unfilled defect, AU—autograft, Ref—reference product (Geistlich Bio-Oss®), HA—refined hydroxyapatite powder, DBM—demineralised bone matrix powder, COLL—purified bone collagen membranes.

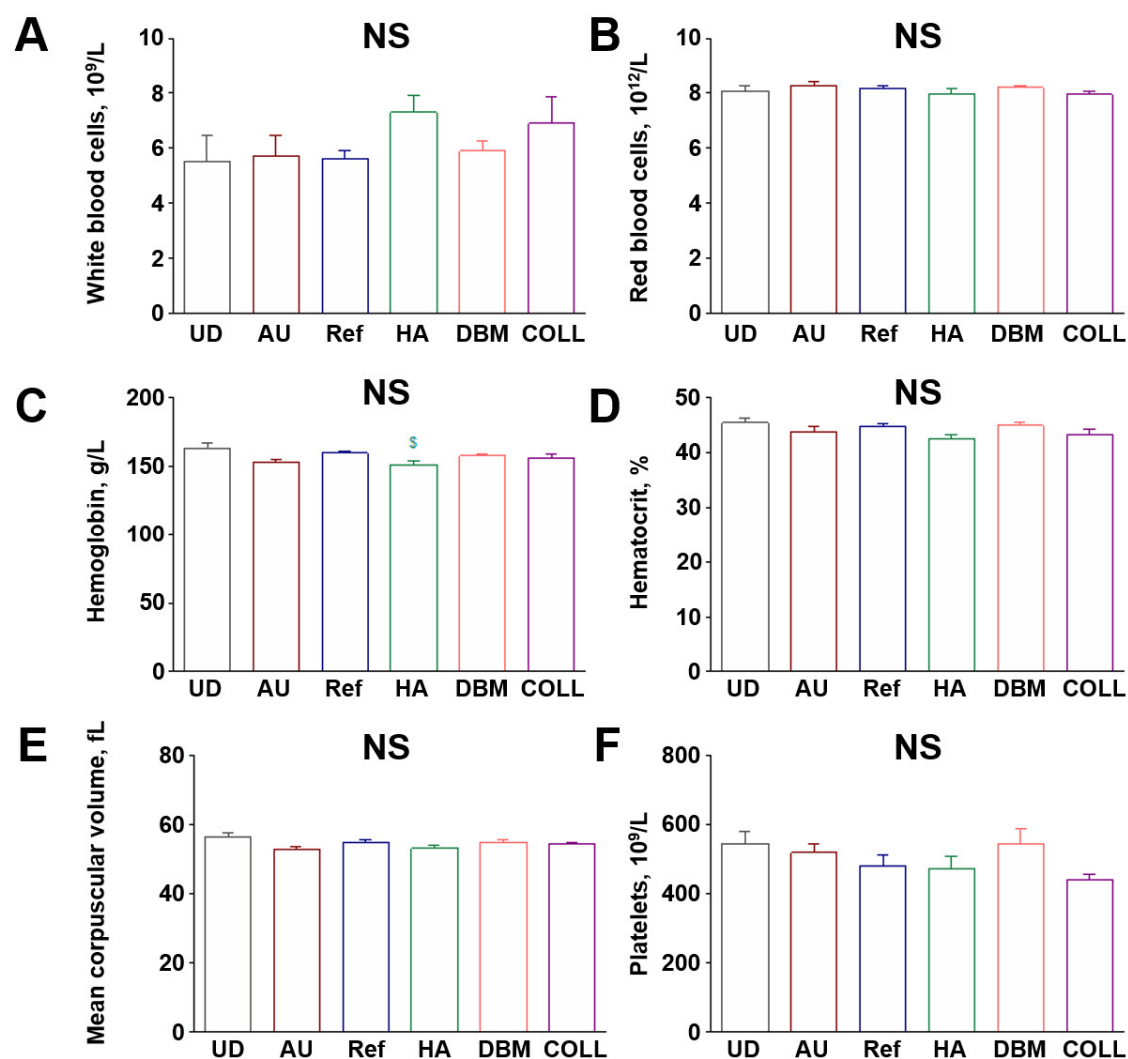

**Figure S2.** Complete blood count measured at 12 weeks postimplantation. (A) White blood cell count; (B) red blood cell count; (C) haemoglobin measurement; (D) haematocrit calculation; (E) mean corpuscular volume measurement; and (F) platelet count. Unfilled defect, autograft, and Geistlich Bio-Oss® represent a negative control, positive control, and reference product, respectively.  $N = 6$  animals per group, one-way analysis of variance with Tukey's multiple comparisons test, no statistically significant differences. NS—non-significant intergroup differences, UD—unfilled defect, AU—autograft, Ref—reference product (Geistlich Bio-Oss®), HA—refined hydroxyapatite powder, DBM—demineralised bone matrix powder, COLL—purified bone collagen membranes.

**Table S1.** Biochemical analysis performed at 12 weeks postimplantation.

| Parameter              | UD          | AU          | Ref         | HA          | DBM         | COLL        | Ref Range | <i>p</i> |
|------------------------|-------------|-------------|-------------|-------------|-------------|-------------|-----------|----------|
| Total protein (g/dL)   | 7.11 ± 0.23 | 6.99 ± 0.09 | 6.92 ± 0.08 | 6.90 ± 0.12 | 6.91 ± 0.19 | 6.96 ± 0.11 | 6.31–7.71 | 0.9      |
| Albumin (g/dL)         | 4.22 ± 0.11 | 4.10 ± 0.07 | 4.16 ± 0.05 | 4.14 ± 0.05 | 4.13 ± 0.08 | 4.12 ± 0.07 | 3.52–4.27 | 0.9      |
| Globulins (g/dL)       | 2.90 ± 0.15 | 2.90 ± 0.08 | 2.75 ± 0.06 | 2.76 ± 0.08 | 2.79 ± 0.17 | 2.84 ± 0.09 | 2.64–3.53 | 0.9      |
| Glucose (mmol/L)       | 11.1 ± 0.6  | 13.8 ± 1.4  | 12.2 ± 1.7  | 11.4 ± 0.7  | 12.3 ± 0.7  | 11.0 ± 0.9  | 4.3–7.81  | 0.5      |
| Triglycerides (mmol/L) | 2.00 ± 0.22 | 1.87 ± 0.31 | 1.45 ± 0.06 | 2.02 ± 0.15 | 2.20 ± 0.24 | 2.05 ± 0.12 | 0.67–2.15 | 0.2      |
| Cholesterol (mmol/L)   | 3.25 ± 0.17 | 3.06 ± 0.18 | 2.96 ± 0.13 | 3.29 ± 0.26 | 3.51 ± 0.42 | 3.41 ± 0.26 | 2.17–3.00 | 0.6      |
| Urea (mmol/L)          | 6.41 ± 0.41 | 6.24 ± 1.14 | 6.48 ± 0.54 | 7.34 ± 0.50 | 6.33 ± 0.90 | 4.85 ± 0.39 | 6.46–8.93 | 0.2      |
| Creatinine (μmol/L)    | 87 ± 4      | 79 ± 6      | 86 ± 10     | 74 ± 13     | 61 ± 6      | 75 ± 5      | –         | 0.3      |
| Bilirubin (μmol/L)     | 2.31 ± 1.24 | 2.19 ± 1.02 | 3.31 ± 0.56 | 4.15 ± 1.12 | 3.65 ± 1.98 | 3.13 ± 0.71 | –         | 0.8      |
| Uric acid (μmol/L)     | 207 ± 26    | 200 ± 41    | 286 ± 61    | 264 ± 40    | 234 ± 32    | 196 ± 30    | –         | 0.5      |
| LDH (IU/L)             | 470 ± 69    | 522 ± 150   | 838 ± 250   | 771 ± 115   | 486 ± 110   | 564 ± 109   | –         | 0.3      |
| AP (IU/L)              | 196 ± 12    | 240 ± 24    | 195 ± 20    | 215 ± 12    | 213 ± 13    | 162 ± 39    | 56–145    | 0.3      |
| ALT (IU/L)             | 41 ± 8      | 53 ± 5      | 64 ± 12     | 66 ± 5      | 53 ± 12     | 44 ± 10     | 20–81     | 0.3      |
| AST (IU/L)             | 153 ± 28    | 78 ± 29     | 62 ± 15     | 91 ± 16     | 134 ± 34    | 95 ± 29     | 41–115    | 0.2      |

*N* = 6 animals per group, one-way analysis of variance with Tukey's multiple comparisons test, no statistically significant differences. UD—unfilled defect, AU—autograft, Ref—reference product (Geistlich Bio-Oss®), HA—refined hydroxyapatite powder, DBM—demineralised bone matrix powder, COLL—purified bone collagen membranes, LDH—lactate dehydrogenase, AP—alkaline phosphatase, ALT—alanine aminotransferase, AST—aspartate aminotransferase, IU—international units.

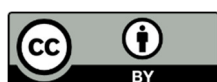

© 2020 by the authors. Submitted for possible open access publication under the terms and conditions of the Creative Commons Attribution (CC BY) license (<http://creativecommons.org/licenses/by/4.0/>).
